# Supplementary material for: Impact on Cloud Properties of Reduced-Sulphur Shipping Fuel in the Eastern North Atlantic
Source: Copernicus journal article supplement (doi:10.5194/egusphere-2025-2075), 2025-06-05
Supplement: Supplementary file 1 [file egusphere-2025-2075-supplement.pdf]

# Impact of Reduced Sulphur in Shipping Fuel on Cloud Properties in the Eastern North Atlantic

Gerald G. Mace<sup>1</sup>, Sally Benson<sup>1</sup>, Peter Gombert<sup>1</sup>, Tiffany Smallwood<sup>1</sup>

<sup>1</sup>Department of Atmospheric Science, University of Utah, Salt Lake City, UT, USA, 84112

<sup>2</sup>Laboratory example, city, postal code, country

Correspondence to: Gerald Mace (Jay.Mace@utah.edu)

## Supplementary Material

**Table S1. Statistics of the MERRA Reanalysis data within 500 km of the ARM ENA site for the pre and post periods. The column P indicates the probability that the distributions of a quantity as indicated in Figure 1 are drawn from the same sample population (null hypothesis) according to the Kolmogorov-Smirnov test using the unique average number of days in each period (500) as the number of independent samples. When P exceeds 0.99, we can be confident at the 99% level that the null hypothesis cannot be rejected, and the data appear drawn from the same sample population.**

|                                        |      | Mean | Median | Standard Deviation | P     |
|----------------------------------------|------|------|--------|--------------------|-------|
| Omega (mb day <sup>-1</sup> )          | Pre  | 6.50 | 9.43   | 20.2               | 0.998 |
|                                        | Post | 5.85 | 9.31   | 20.9               |       |
| EIS (K)                                | Pre  | 1.89 | 1.82   | 2.49               | 0.61  |
|                                        | Post | 1.83 | 1.69   | 2.67               |       |
| Temp Adv (K day <sup>-1</sup> )        | Pre  | 0.49 | 0.44   | 2.92               | 0.999 |
|                                        | Post | 0.53 | 0.49   | 2.74               |       |
| LWP (g m <sup>-2</sup> )               | Pre  | 68   | 60     | 35                 | 0.51  |
|                                        | Post | 73   | 68     | 35                 |       |
| Mid Trop RH (%)                        | Pre  | 41.3 | 39.9   | 22.2               | 0.999 |
|                                        | Post | 41.7 | 40.0   | 21.9               |       |
| Near-Surface Wind (m s <sup>-1</sup> ) | Pre  | 6.56 | 6.13   | 3.31               | 0.999 |
|                                        | Post | 6.39 | 6.12   | 3.04               |       |
|                                        | Post | 5.5  | 5.1    | 2.1                |       |

**Table S2. Statistics of the ENA CCN and Cloud Property Statistics for the pre and post periods. The column P indicates the probability that the distributions of a quantity as indicated in Figure 1 are drawn from the same sample population (null hypothesis) according to the Kolmogorov-Smirnov test using the average of the unique number of days in each period (150.) as the number of independent samples. When P exceeds 0.99, we can be confident at the 99% level that the null hypothesis cannot be rejected, and the data appear drawn from same sample population.**

|                           |      | Mean | Median | Standard Deviation | P       |
|---------------------------|------|------|--------|--------------------|---------|
| CCN (cm <sup>-3</sup> )   | Pre  | 179  | 174    | 144                | <<0.005 |
|                           | Post | 160  | 136    | 107                |         |
| $N_d$ (cm <sup>-3</sup> ) | Pre  | 93   | 77     | 112                | <<0.005 |
|                           | Post | 62   | 40     | 65                 |         |
| $r_e$ (μm)                | Pre  | 12   | 14     | 4                  | <<0.005 |
|                           | Post | 15   | 15     | 5                  |         |

|                                      |      |      |      |      |       |
|--------------------------------------|------|------|------|------|-------|
| LWP ( $\text{g m}^{-2}$ )            | Pre  | 81   | 57   | 64   | 0.30  |
|                                      | Post | 82   | 58   | 63   |       |
| Optical Depth                        | Pre  | 9.2  | 8.2  | 4.8  | 0.998 |
|                                      | Post | 9.1  | 8.1  | 4.9  |       |
| Precip Rate ( $\text{mm day}^{-1}$ ) | Pre  | 0.06 | 0.01 | 0.52 | 0.45  |
|                                      | Post | 0.02 | 0.02 | 0.08 |       |
| PWV (cm)                             | Pre  | 3.1  | 3.0  | 0.74 | 0.91  |
|                                      | Post | 3.1  | 2.9  | 0.78 |       |
| Wind Speed ( $\text{m s}^{-1}$ )     | Pre  | 5.4  | 5.1  | 1.9  | 0.92  |
|                                      | Post | 5.5  | 5.1  | 2.1  |       |

**Table S3. As in Table S2 except for MODIS Cloud and Radiative Properties within 250 km of the ARM ENA site. Also shown is the CERES planetary albedo.**

| Overpasses prior: | Overpasses post: | Mean | Median | Standard Deviation | Zx   | P      |
|-------------------|------------------|------|--------|--------------------|------|--------|
| Nd                | Pre              | 76   | 69     | 41                 | 0.19 | <<0.05 |
|                   | Post             | 63   | 51     | 39                 |      |        |
| re                | Pre              | 13   | 13     | 3.4                | 0.19 | <<0.05 |
|                   | Post             | 14   | 15     | 3.6                |      |        |
| LWP               | Pre              | 62   | 60     | 28                 | 0.11 | 0.005  |
|                   | Post             | 65   | 64     | 26                 |      |        |
| Optical Depth     | Pre              | 7.0  | 6.7    | 2.8                | 0.06 | 0.29   |
|                   | Post             | 6.8  | 6.5    | 2.4                |      |        |
| CERES Albedo      | Pre              | 0.15 | 0.12   | 0.08               | 0.06 | 0.28   |
|                   | Post             | 0.15 | 0.12   | 0.08               |      |        |

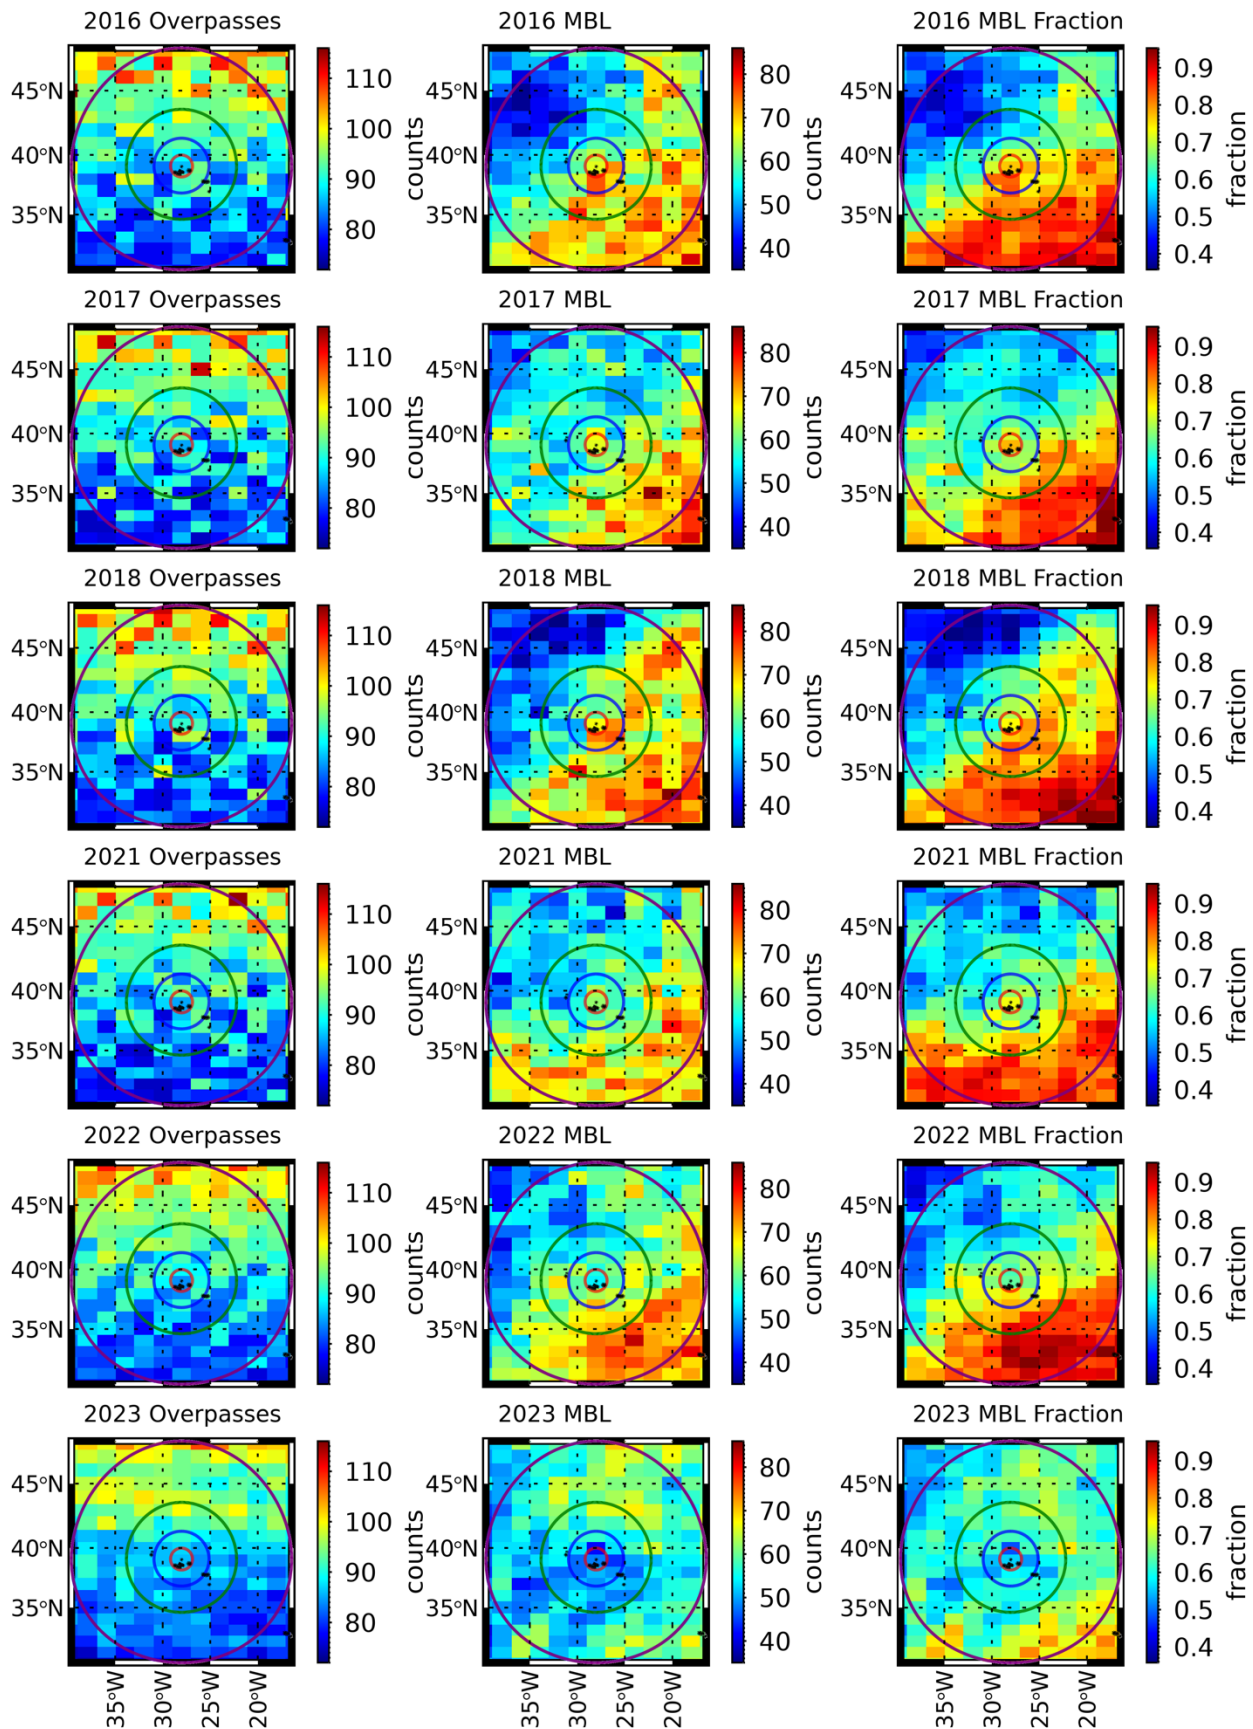

**Figure S1. The year by year analysis of the MODIS overpasses of the region surrounding the ARM-ENA site. Range rings are at 50, 100, 250, and 500 km from the ARM-ENA site. The columns from left to right show the number of overpasses of each 1x1 degree pixel, the occurrence counts of MBL clouds in each pixel, and the resulting fraction. The row from top to bottom are for 2016, 2017, 2018, 2021, 2022, and 2023.**
